# Supplementary material for: No Evidence of Neandertal mtDNA Contribution to Early Modern Humans
Source: PLoS Biol. 2004 Mar 16;2(3):e57. doi: 10.1371/journal.pbio.0020057 (PMC368159; doi:10.1371/journal.pbio.0020057)
Supplement: Figure S1 — (30 KB PDF). [file pbio.0020057.sg001.pdf]

[illegible]
