# Supplementary material for: No Evidence of Neandertal mtDNA Contribution to Early Modern Humans
Source: PubMed Central journal article supplement (PMC368159; doi:10.1371/journal.pbio.0020057), 2004-03-16
Supplement: pbio.0020057.sg003.pdf [file pbio.0020057.sg003.pdf]

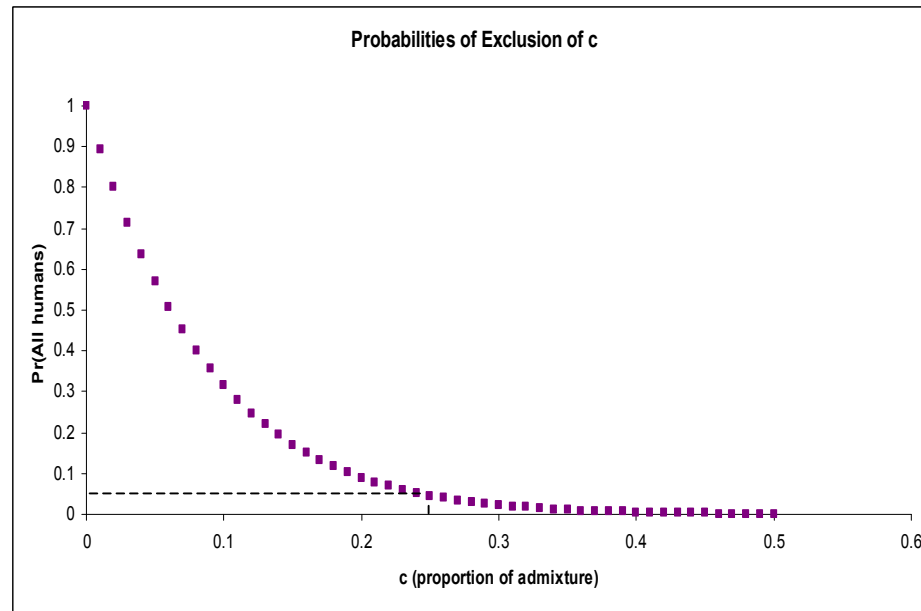

Suppl. Figure S3
