# Supplementary material for: No Evidence of Neandertal mtDNA Contribution to Early Modern Humans
Source: PLoS Biol. 2004 Mar 16;2(3):e57. doi: 10.1371/journal.pbio.0020057 (PMC368159; doi:10.1371/journal.pbio.0020057)
Supplement: Table S1 — The bones were analyzed by high performance liquid chromatography for their amino acid content (see Materials and Methods). The extent of racemization of aspartic acid (D-/L-Asp), the ratio of glycine to aspartic acid (Gly/Asp), and the total amount of the eight amino acid analyzed (ppm) are given for each specimen. Zero indicates values below detection level. The five human and four Neandertal specimens from which DNA extraction were performed are displayed in green. (54 KB PDF). [file pbio.0020057.st001.pdf]

**Supplementary Table 1. Amino acid analyses of 64 hominid remains**

| Specimen/Provenience              | Taxon                | D/L Asp      | Gly/Asp     | ppm          |
|-----------------------------------|----------------------|--------------|-------------|--------------|
| Abri Pataud, France               | Modern Humans        | 0.086        | 3.18        | 14380        |
| Abri Pataud, France               | Modern Humans        | 0            | 3.87        | 24817        |
| Abri Pataud, France               | Modern Humans        | 0            | 0           | 0            |
| Abri Pataud, France               | Modern Humans        | 0.068        | 4.61        | 24743        |
| Abri Pataud, France               | Modern Humans        | 0            | 3.77        | 17582        |
| <b>Abri Pataud, France</b>        | <b>Modern Humans</b> | <b>0.062</b> | <b>7.37</b> | <b>56119</b> |
| Cro Magnon, France                | Modern Humans        | 0            | 6.98        | 6438         |
| Cro Magnon, France                | Modern Humans        | 0.011        | 2.11        | 2287         |
| Cro Magnon, France                | Modern Humans        | 0            | 1.9         | 1784         |
| Cro Magnon, France                | Modern Humans        | 0.095        | 1.7         | 2060         |
| Cro Magnon, France                | Modern Humans        | 0.117        | 2.97        | 13532        |
| <b>Cro Magnon, France</b>         | <b>Modern Humans</b> | <b>0.081</b> | <b>7.59</b> | <b>56684</b> |
| La Madeleine, France              | Modern Humans        | 0            | 5.02        | 14384        |
| La Madeleine, France              | Modern Humans        | 0            | 5.34        | 18880        |
| La Madeleine, France              | Modern Humans        | 0            | 0           | 0            |
| La Madeleine, France              | Modern Humans        | 0.096        | 1.17        | 4985         |
| La Madeleine, France              | Modern Humans        | 0.095        | 1.75        | 7688         |
| La Madeleine, France              | Modern Humans        | 0.086        | 0.78        | 5256         |
| <b>La Madeleine, France</b>       | <b>Modern Humans</b> | <b>0.091</b> | <b>7.21</b> | <b>29901</b> |
| <b>Mladec 2, Czech Republic</b>   | <b>Modern Humans</b> | <b>0.080</b> | <b>8.25</b> | <b>87436</b> |
| Mladec 21, Czech Republic         | Modern Humans        | 0.330        | 13.71       | 4895         |
| Mladec 25a, Czech Republic        | Modern Humans        | 0.003        | 8.22        | 14565        |
| <b>Mladec 25c, Czech Republic</b> | <b>Modern Humans</b> | <b>0.009</b> | <b>9.06</b> | <b>53718</b> |
| Mladec 26, Czech Republic         | Modern Humans        | 0            | 9.89        | 3253         |
| Mladec 27, Czech Republic         | Modern Humans        | 0            | 113.48      | 24156        |
| Mladec 27, Czech Republic         | Modern Humans        | 0            | 11.81       | 3883         |
| Mladec 28, Czech Republic         | Modern Humans        | 0            | 8.53        | 3343         |
| Mladec 28, Czech Republic         | Modern Humans        | 0            | 9.69        | 2151         |
| Mladec 33, Czech Republic         | Modern Humans        | 0            | 11.37       | 4001         |
| Mladec 8, Czech Republic          | Modern Humans        | 0.133        | 5.21        | 3488         |
| Mladec child, Czech Republic      | Modern Humans        | 0            | 115.01      | 9308         |
| Sandalja, Croatia                 | Modern Humans        | 0.115        | 0.97        | 10848        |
| Sandalja, Croatia                 | Modern Humans        | 0.12         | 0.95        | 22256        |
| Sandalja, Croatia                 | Modern Humans        | 0.111        | 1.19        | 10950        |
| Veternica, Croatia                | Modern Humans        | 0.089        | 3.7         | 9429         |
| Veternica, Croatia                | Modern Humans        | 0.092        | 1           | 11886        |
| Veternica, Croatia                | Modern Humans        | 0.066        | 1.09        | 12218        |
| Veternica, Croatia                | Modern Humans        | 0.082        | 6.7         | 23509        |
| Veternica, Croatia                | Modern Humans        | 0.076        | 1.37        | 22340        |
| Veternica, Croatia                | Modern Humans        | 0.07         | 1.11        | 13161        |
| Monte Circeo, Italia              | Neandertal           | 0.244        | 4.57        | 371          |
| Amud, Israel                      | Neandertal           | 0.171        | 1.79        | 164          |
| Dederiyeh, Syria                  | Neandertal           | 0.000        | 4.48        | 200          |
| Dederiyeh, Syria                  | Neandertal           | 0.000        | 0           | 0            |
| El Sidron, Spain                  | Neandertal           | 0.053        | 9.92        | 9924         |
| <b>Engis 2, Belgium</b>           | <b>Neandertal</b>    | <b>0.086</b> | <b>7.55</b> | <b>31561</b> |
| Krapina, Croatia                  | Neandertal           | 0.223        | 3.77        | 7044         |
| Krapina, Croatia                  | Neandertal           | 0            | 0           | 0            |
| Krapina, Croatia                  | Neandertal           | 0            | 0           | 0            |
| La Ferassie 2, France             | Neandertal           | 0.033        | 9.80        | 1419         |
| La Ferassie 1, France             | Neandertal           | 0.251        | 7.12        | 40353        |

|                                |            |       |      |       |
|--------------------------------|------------|-------|------|-------|
| La Ferassie 1, France          | Neandertal | 0.296 | 2.06 | 85510 |
| La Ferassie 1, France          | Neandertal | 0.263 | 3.13 | 30150 |
| La Ferassie 1, France          | Neandertal | 0.165 | 6.07 | 36405 |
| La Ferassie 1, France          | Neandertal | 0.141 | 4.28 | 42145 |
| La-Chapelle-aux-Saints, France | Neandertal | 0     | 7.49 | 2190  |
| La-Chapelle-aux-Saints, France | Neandertal | 0.068 | 4.89 | 19650 |
| La-Chapelle-aux-Saints, France | Neandertal | 0.065 | 7.97 | 55128 |
| LaQuina, France                | Neandertal | 0     | 0    | 0     |
| LaQuina, France                | Neandertal | 0.081 | 1    | 2931  |
| LaQuina, France                | Neandertal | 0.225 | 0    | 194   |
| LaQuina, France                | Neandertal | 0     | 0    | 0     |
| Vindija Vi-80, Croatia         | Neandertal | 0.074 | 5.95 | 45212 |
| Vindija Vi-77, Croatia         | Neandertal | 0.071 | 3.01 | 74596 |
